# Supplementary material
Source: PubMed Central journal article supplement (PMC2227710)
Supplement: aem_74_3_850__1.pdf [file aem_74_3_850__1.pdf]

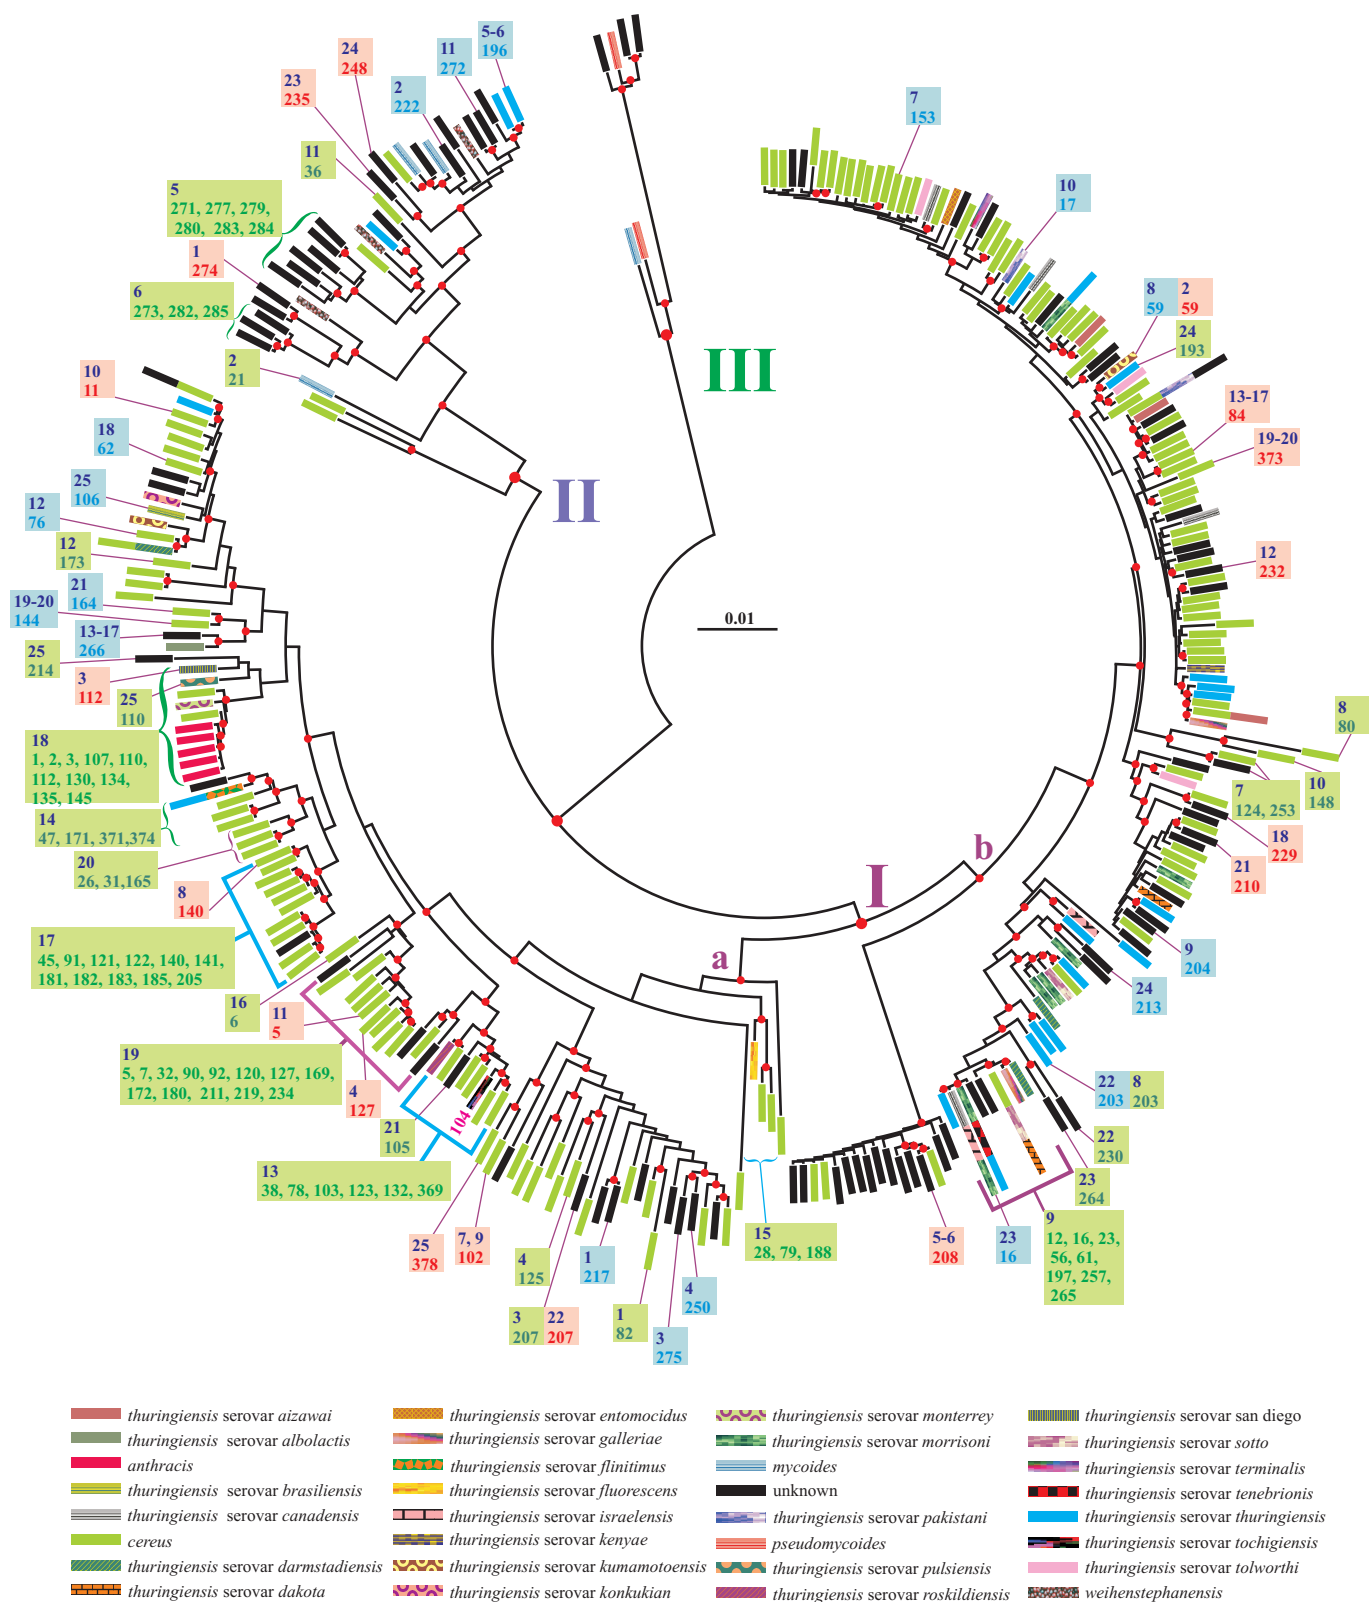

Supporting Figure. Distribution of STs involved in Horizontal Gene Transfer (HGT) events.

NJ tree depicting the phylogenetic relationships amongst unique MLST isolates. Scale bar, distance calculated according to Tamura and Nei evolutionary model. STs are indicated only with the number. Deep purple-colored number, potential HGT event. Green background and green-colored number, STs affected by HGT. Azure background and azure-colored number, major parent ST. Pink color background and red-colored number, minor parent ST. Fuchsia-colored number, ST not involved in the specific HGT event.

## eBURST Report

No. isolates = **449** | No. STs = **296** | No. re-samplings for bootstrapping = **1000**

No. loci per isolate = **7** | No. identical loci for group def = **6** | No. groups = **35**

**SLV = Single-Locus Variant ST; DLV = Double-Locus Variant ST; TLV = Three-Loci Variant ST; SAT = Satellite ST. Reader should refer to eBurst Manual for further details (web site: <http://eburst.mlst.net/>).**

### Rules used to name clonal complexes.

A clonal complex (CC):

- was named according to its putative primary founder, provided that this latter had been identified (e.g. CC23) by eBurst analysis;
- was named with the ST having the best BT score when multiple candidates existed as predicted founder (e.g. CC115);
- was named with the ST including the higher number of isolates when no predicted founder existed (e.g. CC205);
- was named with the ST having the older profile (represented here by the smallest number) when no predicted founder existed and all STs included the same number of isolates (e.g. CC42).

| CC23 (group 01) |      | No. Isolates = 36 |     | No. STs = 19 |     | Predicted Founder = 23 |              |          |
|-----------------|------|-------------------|-----|--------------|-----|------------------------|--------------|----------|
| ST              | FREQ | SLV               | DLV | TLV          | SAT | Average Distance       | ST Bootstrap |          |
|                 |      |                   |     |              |     |                        | Group        | Subgroup |
| <b>23</b>       | 9    | 9                 | 6   | 3            | 0   | 1.66                   | 92%          | 97%      |
| 197             | 1    | 6                 | 10  | 2            | 0   | 1.77                   | 32%          | 49%      |
| 16              | 3    | 5                 | 8   | 5            | 0   | 2.0                    | 5%           | 13%      |
| 257             | 1    | 4                 | 10  | 4            | 0   | 2.0                    | 7%           | 21%      |
| 265             | 1    | 4                 | 9   | 5            | 0   | 2.05                   | 0%           | 0%       |
| 264             | 1    | 4                 | 9   | 5            | 0   | 2.05                   | 0%           | 0%       |
| 12              | 5    | 4                 | 8   | 6            | 0   | 2.11                   | 5%           | 14%      |
| 56              | 4    | 4                 | 7   | 7            | 0   | 2.16                   | 4%           | 18%      |
| 9               | 1    | 3                 | 10  | 5            | 0   | 2.11                   | 0%           | 0%       |
| 202             | 1    | 3                 | 9   | 5            | 1   | 2.22                   | 0%           | 0%       |
| 69              | 1    | 3                 | 9   | 5            | 1   | 2.22                   | 1%           | 0%       |
| 192             | 1    | 2                 | 6   | 8            | 2   | 2.55                   | 0%           | 0%       |
| 203             | 1    | 1                 | 9   | 5            | 3   | 2.55                   | 0%           | 0%       |
| 70              | 1    | 1                 | 7   | 8            | 2   | 2.61                   | 0%           | 0%       |
| 67              | 1    | 1                 | 6   | 10           | 1   | 2.61                   | 0%           | 0%       |
| 49              | 1    | 1                 | 5   | 10           | 2   | 2.72                   | 0%           | 0%       |
| 55              | 1    | 1                 | 4   | 11           | 2   | 2.77                   | 0%           | 0%       |
| 189             | 1    | 1                 | 3   | 9            | 5   | 3.0                    | 0%           | 0%       |
| 61              | 1    | 1                 | 3   | 7            | 7   | 3.11                   | 0%           | 0%       |

| CC142 (group 02) |      | No. Isolates = 17 |     | No. STs = 8 |     | Predicted Founder = 142 |              |          |
|------------------|------|-------------------|-----|-------------|-----|-------------------------|--------------|----------|
| ST               | FREQ | SLV               | DLV | TLV         | SAT | Average Distance        | ST Bootstrap |          |
|                  |      |                   |     |             |     |                         | Group        | Subgroup |
| <b>142</b>       | 9    | 4                 | 3   | 0           | 0   | 1.42                    | 77%          | 55%      |
| 155              | 1    | 3                 | 3   | 1           | 0   | 1.71                    | 30%          | 22%      |
| 4                | 2    | 2                 | 3   | 2           | 0   | 2.0                     | 2%           | 0%       |
| 176              | 1    | 1                 | 4   | 2           | 0   | 2.14                    | 0%           | 0%       |
| 153              | 1    | 1                 | 3   | 3           | 0   | 2.28                    | 0%           | 0%       |
| 220              | 1    | 1                 | 3   | 2           | 1   | 2.42                    | 0%           | 0%       |
| 184              | 1    | 1                 | 2   | 3           | 1   | 2.57                    | 0%           | 0%       |
| 179              | 1    | 1                 | 1   | 3           | 2   | 2.85                    | 0%           | 0%       |

| CC111 (group 03) |      | No. Isolates = 10 |     | No. STs = 6 |     | Predicted Founder = 111 |              |          |
|------------------|------|-------------------|-----|-------------|-----|-------------------------|--------------|----------|
| ST               | FREQ | SLV               | DLV | TLV         | SAT | Average Distance        | ST Bootstrap |          |
|                  |      |                   |     |             |     |                         | Group        | Subgroup |
| <b>111</b>       | 4    | 4                 | 1   | 0           | 0   | 1.2                     | 74%          | 55%      |
| 223              | 1    | 3                 | 2   | 0           | 0   | 1.4                     | 36%          | 15%      |
| 249              | 1    | 2                 | 3   | 0           | 0   | 1.6                     | 0%           | 0%       |
| 268              | 2    | 1                 | 3   | 1           | 0   | 2.0                     | 0%           | 0%       |
| 72               | 1    | 1                 | 3   | 1           | 0   | 2.0                     | 0%           | 0%       |
| 218              | 1    | 1                 | 2   | 2           | 0   | 2.2                     | 0%           | 0%       |

| CC18 (group 04) |      | No. Isolates = 9 |     | No. STs = 5 |     | Predicted Founder = 18 |              |          |
|-----------------|------|------------------|-----|-------------|-----|------------------------|--------------|----------|
| ST              | FREQ | SLV              | DLV | TLV         | SAT | Average Distance       | ST Bootstrap |          |
|                 |      |                  |     |             |     |                        | Group        | Subgroup |
| <b>18</b>       | 5    | 3                | 1   | 0           | 0   | 1.25                   | 46%          | 14%      |
| 138             | 1    | 2                | 2   | 0           | 0   | 1.5                    | 18%          | 0%       |
| 225             | 1    | 2                | 2   | 0           | 0   | 1.5                    | 5%           | 0%       |
| 54              | 1    | 2                | 2   | 0           | 0   | 1.5                    | 8%           | 0%       |
| 241             | 1    | 1                | 3   | 0           | 0   | 1.75                   | 0%           | 0%       |

| CC8 (group 05) |      | No. Isolates = 15 |     | No. STs = 4 |     | Predicted Founder = 8 |              |          |
|----------------|------|-------------------|-----|-------------|-----|-----------------------|--------------|----------|
| ST             | FREQ | SLV               | DLV | TLV         | SAT | Average Distance      | ST Bootstrap |          |
|                |      |                   |     |             |     |                       | Group        | Subgroup |
| <b>8</b>       | 10   | 3                 | 0   | 0           | 0   | 1.0                   | 61%          | 16%      |
| 25             | 3    | 2                 | 1   | 0           | 0   | 1.33                  | 4%           | 0%       |
| 199            | 1    | 2                 | 1   | 0           | 0   | 1.33                  | 9%           | 0%       |
| 195            | 1    | 1                 | 2   | 0           | 0   | 1.66                  | 0%           | 0%       |

| CC115 (group 06) |      | No. Isolates = 4 |     | No. STs = 4 |     | Predicted Founder = Multiple Candidates |              |          |
|------------------|------|------------------|-----|-------------|-----|-----------------------------------------|--------------|----------|
| ST               | FREQ | SLV              | DLV | TLV         | SAT | Average Distance                        | ST Bootstrap |          |
|                  |      |                  |     |             |     |                                         | Group        | Subgroup |
| 196              | 1    | 3                | 0   | 0           | 0   | 1.0                                     | 18%          | 13%      |
| 190              | 1    | 3                | 0   | 0           | 0   | 1.0                                     | 17%          | 13%      |
| 200              | 1    | 3                | 0   | 0           | 0   | 1.0                                     | 22%          | 13%      |
| <b>115</b>       | 1    | 3                | 0   | 0           | 0   | 1.0                                     | 39%          | 13%      |

| CC182 (group 07) |      | No. Isolates = 4 |     | No. STs = 4 |     | Predicted Founder = 182 |              |          |
|------------------|------|------------------|-----|-------------|-----|-------------------------|--------------|----------|
| ST               | FREQ | SLV              | DLV | TLV         | SAT | Average Distance        | ST Bootstrap |          |
|                  |      |                  |     |             |     |                         | Group        | Subgroup |
| <b>182</b>       | 1    | 3                | 0   | 0           | 0   | 1.0                     | 60%          | 14%      |
| 183              | 1    | 2                | 1   | 0           | 0   | 1.33                    | 6%           | 0%       |
| 28               | 1    | 2                | 1   | 0           | 0   | 1.33                    | 11%          | 0%       |
| 181              | 1    | 1                | 2   | 0           | 0   | 1.66                    | 0%           | 0%       |

| CC62 (group 08) |      | No. Isolates = 4 |     | No. STs = 4 |     | Predicted Founder = Multiple Candidates |              |          |
|-----------------|------|------------------|-----|-------------|-----|-----------------------------------------|--------------|----------|
| ST              | FREQ | SLV              | DLV | TLV         | SAT | Average Distance                        | ST Bootstrap |          |
|                 |      |                  |     |             |     |                                         | Group        | Subgroup |
| 163             | 1    | 2                | 1   | 0           | 0   | 1.33                                    | 20%          | 0%       |
| 108             | 1    | 2                | 1   | 0           | 0   | 1.33                                    | 22%          | 0%       |
| 75              | 1    | 2                | 1   | 0           | 0   | 1.33                                    | 25%          | 0%       |
| <b>62</b>       | 1    | 2                | 1   | 0           | 0   | 1.33                                    | 29%          | 0%       |

| CC73 (group 09) |      | No. Isolates = 7 |     | No. STs = 4 |     | Predicted Founder = 73 |              |          |
|-----------------|------|------------------|-----|-------------|-----|------------------------|--------------|----------|
| ST              | FREQ | SLV              | DLV | TLV         | SAT | Average Distance       | ST Bootstrap |          |
|                 |      |                  |     |             |     |                        | Group        | Subgroup |
| <b>73</b>       | 3    | 3                | 0   | 0           | 0   | 1.0                    | 74%          | 14%      |
| 94              | 2    | 1                | 2   | 0           | 0   | 1.66                   | 0%           | 0%       |
| 148             | 1    | 1                | 2   | 0           | 0   | 1.66                   | 0%           | 0%       |
| 99              | 1    | 1                | 2   | 0           | 0   | 1.66                   | 0%           | 0%       |

| CC1 (group 10) |      | No. Isolates = 3 |     | No. STs = 4 |     | Predicted Founder = 1 |              |          |
|----------------|------|------------------|-----|-------------|-----|-----------------------|--------------|----------|
| ST             | FREQ | SLV              | DLV | TLV         | SAT | Average Distance      | ST Bootstrap |          |
|                |      |                  |     |             |     |                       | Group        | Subgroup |
| 1              | 17   | 3                | 0   | 0           | 0   | 1.0                   | 77%          | 12%      |
| 3              | 4    | 1                | 2   | 0           | 0   | 1.66                  | 0%           | 0%       |
| 135            | 1    | 1                | 2   | 0           | 0   | 1.66                  | 0%           | 0%       |
| 134            | 1    | 1                | 2   | 0           | 0   | 1.66                  | 0%           | 0%       |

| CC96 (group 11) |      | No. Isolates = 4 |     | No. STs = 4 |     | Predicted Founder = Multiple Candidates |              |          |
|-----------------|------|------------------|-----|-------------|-----|-----------------------------------------|--------------|----------|
| ST              | FREQ | SLV              | DLV | TLV         | SAT | Average Distance                        | ST Bootstrap |          |
|                 |      |                  |     |             |     |                                         | Group        | Subgroup |
| 96              | 1    | 2                | 1   | 0           | 0   | 1.33                                    | 27%          | 0%       |
| 34              | 1    | 2                | 1   | 0           | 0   | 1.33                                    | 28%          | 0%       |
| 101             | 1    | 1                | 1   | 1           | 0   | 2.0                                     | 0%           | 0%       |
| 86              | 1    | 1                | 1   | 1           | 0   | 2.0                                     | 0%           | 0%       |

| CC33 (group 12) |      | No. Isolates = 3 |     | No. STs = 3 |     | Predicted Founder = 33 |              |          |
|-----------------|------|------------------|-----|-------------|-----|------------------------|--------------|----------|
| ST              | FREQ | SLV              | DLV | TLV         | SAT | Average Distance       | ST Bootstrap |          |
|                 |      |                  |     |             |     |                        | Group        | Subgroup |
| 33              | 1    | 2                | 0   | 0           | 0   | 1.0                    | 30%          | 0%       |
| 175             | 1    | 1                | 1   | 0           | 0   | 1.5                    | 0%           | 0%       |
| 373             | 1    | 1                | 1   | 0           | 0   | 1.5                    | 0%           | 0%       |

| CC277 (group 13) |      | No. Isolates = 2 |     | No. STs = 2 |     | Predicted Founder = None |              |          |
|------------------|------|------------------|-----|-------------|-----|--------------------------|--------------|----------|
| ST               | FREQ | SLV              | DLV | TLV         | SAT | Average Distance         | ST Bootstrap |          |
|                  |      |                  |     |             |     |                          | Group        | Subgroup |
| 280              | 1    | 1                | 0   | 0           | 0   | 1.0                      | ***          | ***      |
| 277              | 1    | 1                | 0   | 0           | 0   | 1.0                      | ***          | ***      |

| CC42 (group 14) |      | No. Isolates = 2 |     | No. STs = 2 |     | Predicted Founder = None |              |          |
|-----------------|------|------------------|-----|-------------|-----|--------------------------|--------------|----------|
| ST              | FREQ | SLV              | DLV | TLV         | SAT | Average Distance         | ST Bootstrap |          |
|                 |      |                  |     |             |     |                          | Group        | Subgroup |
| 274             | 1    | 1                | 0   | 0           | 0   | 1.0                      | ***          | ***      |
| 42              | 1    | 1                | 0   | 0           | 0   | 1.0                      | ***          | ***      |

| CC269 (group 15) |      | No. Isolates = 2 |     | No. STs = 2 |     | Predicted Founder = None |              |          |
|------------------|------|------------------|-----|-------------|-----|--------------------------|--------------|----------|
| ST               | FREQ | SLV              | DLV | TLV         | SAT | Average Distance         | ST Bootstrap |          |
|                  |      |                  |     |             |     |                          | Group        | Subgroup |
| 272              | 1    | 1                | 0   | 0           | 0   | 1.0                      | ***          | ***      |
| 269              | 1    | 1                | 0   | 0           | 0   | 1.0                      | ***          | ***      |

| CC260 (group 16) |      | No. Isolates = 2 |     | No. STs = 2 |     | Predicted Founder = None |              |          |
|------------------|------|------------------|-----|-------------|-----|--------------------------|--------------|----------|
| ST               | FREQ | SLV              | DLV | TLV         | SAT | Average Distance         | ST Bootstrap |          |
|                  |      |                  |     |             |     |                          | Group        | Subgroup |
| 261              | 1    | 1                | 0   | 0           | 0   | 1.0                      | ***          | ***      |
| 260              | 1    | 1                | 0   | 0           | 0   | 1.0                      | ***          | ***      |

| CC10 (group 17) |      | No. Isolates = 9 |     | No. STs = 2 |     | Predicted Founder = None |              |          |
|-----------------|------|------------------|-----|-------------|-----|--------------------------|--------------|----------|
| ST              | FREQ | SLV              | DLV | TLV         | SAT | Average Distance         | ST Bootstrap |          |
|                 |      |                  |     |             |     |                          | Group        | Subgroup |
| 10              | 8    | 1                | 0   | 0           | 0   | 1.0                      | ***          | ***      |
| 256             | 1    | 1                | 0   | 0           | 0   | 1.0                      | ***          | ***      |

| CC191 (group 18) |      | No. Isolates = 2 |     | No. STs = 2 |     | Predicted Founder = None |              |          |
|------------------|------|------------------|-----|-------------|-----|--------------------------|--------------|----------|
| ST               | FREQ | SLV              | DLV | TLV         | SAT | Average Distance         | ST Bootstrap |          |
|                  |      |                  |     |             |     |                          | Group        | Subgroup |
| 191              | 1    | 1                | 0   | 0           | 0   | 1.0                      | ***          | ***      |
| 204              | 1    | 1                | 0   | 0           | 0   | 1.0                      | ***          | ***      |

| CC97 (group 19) |      | No. Isolates = 2 |     | No. STs = 2 |     | Predicted Founder = None |              |          |
|-----------------|------|------------------|-----|-------------|-----|--------------------------|--------------|----------|
|                 |      |                  |     |             |     | Average                  | ST Bootstrap |          |
| ST              | FREQ | SLV              | DLV | TLV         | SAT | Distance                 | Group        | Subgroup |
| 229             | 1    | 1                | 0   | 0           | 0   | 1.0                      | ***          | ***      |
| 97              | 1    | 1                | 0   | 0           | 0   | 1.0                      | ***          | ***      |

| CC187 (group 20) |      | No. Isolates = 2 |     | No. STs = 2 |     | Predicted Founder = None |              |          |
|------------------|------|------------------|-----|-------------|-----|--------------------------|--------------|----------|
|                  |      |                  |     |             |     | Average                  | ST Bootstrap |          |
| ST               | FREQ | SLV              | DLV | TLV         | SAT | Distance                 | Group        | Subgroup |
| 222              | 1    | 1                | 0   | 0           | 0   | 1.0                      | ***          | ***      |
| 187              | 1    | 1                | 0   | 0           | 0   | 1.0                      | ***          | ***      |

| CC158 (group 21) |      | No. Isolates = 2 |     | No. STs = 2 |     | Predicted Founder = None |              |          |
|------------------|------|------------------|-----|-------------|-----|--------------------------|--------------|----------|
|                  |      |                  |     |             |     | Average                  | ST Bootstrap |          |
| ST               | FREQ | SLV              | DLV | TLV         | SAT | Distance                 | Group        | Subgroup |
| 208              | 1    | 1                | 0   | 0           | 0   | 1.0                      | ***          | ***      |
| 158              | 1    | 1                | 0   | 0           | 0   | 1.0                      | ***          | ***      |

| CC205 (group 22) |      | No. Isolates = 3 |     | No. STs = 2 |     | Predicted Founder = None |              |          |
|------------------|------|------------------|-----|-------------|-----|--------------------------|--------------|----------|
|                  |      |                  |     |             |     | Average                  | ST Bootstrap |          |
| ST               | FREQ | SLV              | DLV | TLV         | SAT | Distance                 | Group        | Subgroup |
| 205              | 2    | 1                | 0   | 0           | 0   | 1.0                      | ***          | ***      |
| 45               | 1    | 1                | 0   | 0           | 0   | 1.0                      | ***          | ***      |

| CC84 (group 23) |      | No. Isolates = 2 |     | No. STs = 2 |     | Predicted Founder = None |              |          |
|-----------------|------|------------------|-----|-------------|-----|--------------------------|--------------|----------|
|                 |      |                  |     |             |     | Average                  | ST Bootstrap |          |
| ST              | FREQ | SLV              | DLV | TLV         | SAT | Distance                 | Group        | Subgroup |
| 166             | 1    | 1                | 0   | 0           | 0   | 1.0                      | ***          | ***      |
| 84              | 1    | 1                | 0   | 0           | 0   | 1.0                      | ***          | ***      |

| CC26 (group 24) |      | No. Isolates = 10 |     | No. STs = 2 |     | Predicted Founder = None |              |          |
|-----------------|------|-------------------|-----|-------------|-----|--------------------------|--------------|----------|
|                 |      |                   |     |             |     | Average                  | ST Bootstrap |          |
| ST              | FREQ | SLV               | DLV | TLV         | SAT | Distance                 | Group        | Subgroup |
| 26              | 9    | 1                 | 0   | 0           | 0   | 1.0                      | ***          | ***      |
| 165             | 1    | 1                 | 0   | 0           | 0   | 1.0                      | ***          | ***      |

| CC144 (group 25) |      | No. Isolates = 4 |     | No. STs = 2 |     | Predicted Founder = None |              |          |
|------------------|------|------------------|-----|-------------|-----|--------------------------|--------------|----------|
|                  |      |                  |     |             |     | Average                  | ST Bootstrap |          |
| ST               | FREQ | SLV              | DLV | TLV         | SAT | Distance                 | Group        | Subgroup |
| 164              | 2    | 1                | 0   | 0           | 0   | 1.0                      | ***          | ***      |
| 144              | 2    | 1                | 0   | 0           | 0   | 1.0                      | ***          | ***      |

| CC98 (group 26) |      | No. Isolates = 2 |     | No. STs = 2 |     | Predicted Founder = None |              |          |
|-----------------|------|------------------|-----|-------------|-----|--------------------------|--------------|----------|
|                 |      |                  |     |             |     | Average                  | ST Bootstrap |          |
| ST              | FREQ | SLV              | DLV | TLV         | SAT | Distance                 | Group        | Subgroup |
| 162             | 1    | 1                | 0   | 0           | 0   | 1.0                      | ***          | ***      |
| 98              | 1    | 1                | 0   | 0           | 0   | 1.0                      | ***          | ***      |

| CC91 (group 27) |      | No. Isolates = 2 |     | No. STs = 2 |     | Predicted Founder = None |              |          |
|-----------------|------|------------------|-----|-------------|-----|--------------------------|--------------|----------|
|                 |      |                  |     |             |     | Average                  | ST Bootstrap |          |
| ST              | FREQ | SLV              | DLV | TLV         | SAT | Distance                 | Group        | Subgroup |
| 140             | 1    | 1                | 0   | 0           | 0   | 1.0                      | ***          | ***      |
| 91              | 1    | 1                | 0   | 0           | 0   | 1.0                      | ***          | ***      |

| CC92 (group 28) |      | No. Isolates = 2 |     | No. STs = 2 |     | Predicted Founder = None |              |          |
|-----------------|------|------------------|-----|-------------|-----|--------------------------|--------------|----------|
|                 |      |                  |     |             |     | Average                  | ST Bootstrap |          |
| ST              | FREQ | SLV              | DLV | TLV         | SAT | Distance                 | Group        | Subgroup |
| 127             | 1    | 1                | 0   | 0           | 0   | 1.0                      | ***          | ***      |
| 92              | 1    | 1                | 0   | 0           | 0   | 1.0                      | ***          | ***      |

| CC121 (group 29) |      | No. Isolates = 2 |     | No. STs = 2 |     | Predicted Founder = None |              |          |
|------------------|------|------------------|-----|-------------|-----|--------------------------|--------------|----------|
|                  |      |                  |     |             |     | Average                  | ST Bootstrap |          |
| ST               | FREQ | SLV              | DLV | TLV         | SAT | Distance                 | Group        | Subgroup |
| 122              | 1    | 1                | 0   | 0           | 0   | 1.0                      | ***          | ***      |
| 121              | 1    | 1                | 0   | 0           | 0   | 1.0                      | ***          | ***      |

| CC85 (group 30) |      | No. Isolates = 2 |     | No. STs = 2 |     | Predicted Founder = None |              |          |
|-----------------|------|------------------|-----|-------------|-----|--------------------------|--------------|----------|
|                 |      |                  |     |             |     | Average                  | ST Bootstrap |          |
| ST              | FREQ | SLV              | DLV | TLV         | SAT | Distance                 | Group        | Subgroup |
| 118             | 1    | 1                | 0   | 0           | 0   | 1.0                      | ***          | ***      |
| 85              | 1    | 1                | 0   | 0           | 0   | 1.0                      | ***          | ***      |

| CC109 (group 31) |      | No. Isolates = 6 |     | No. STs = 2 |     | Predicted Founder = None |              |          |
|------------------|------|------------------|-----|-------------|-----|--------------------------|--------------|----------|
|                  |      |                  |     |             |     | Average                  | ST Bootstrap |          |
| ST               | FREQ | SLV              | DLV | TLV         | SAT | Distance                 | Group        | Subgroup |
| 109              | 4    | 1                | 0   | 0           | 0   | 1.0                      | ***          | ***      |
| 11               | 2    | 1                | 0   | 0           | 0   | 1.0                      | ***          | ***      |

| CC38 (group 32) |      | No. Isolates = 2 |     | No. STs = 2 |     | Predicted Founder = None |              |          |
|-----------------|------|------------------|-----|-------------|-----|--------------------------|--------------|----------|
|                 |      |                  |     |             |     | Average                  | ST Bootstrap |          |
| ST              | FREQ | SLV              | DLV | TLV         | SAT | Distance                 | Group        | Subgroup |
| 103             | 1    | 1                | 0   | 0           | 0   | 1.0                      | ***          | ***      |
| 38              | 1    | 1                | 0   | 0           | 0   | 1.0                      | ***          | ***      |

| CC374 (group 33) |      | No. Isolates = 4 |     | No. STs = 2 |     | Predicted Founder = None |              |          |
|------------------|------|------------------|-----|-------------|-----|--------------------------|--------------|----------|
|                  |      |                  |     |             |     | Average                  | ST Bootstrap |          |
| ST               | FREQ | SLV              | DLV | TLV         | SAT | Distance                 | Group        | Subgroup |
| 374              | 3    | 1                | 0   | 0           | 0   | 1.0                      | ***          | ***      |
| 47               | 1    | 1                | 0   | 0           | 0   | 1.0                      | ***          | ***      |

| CC371 (group 34) |      | No. Isolates = 5 |     | No. STs = 2 |     | Predicted Founder = None |              |          |
|------------------|------|------------------|-----|-------------|-----|--------------------------|--------------|----------|
|                  |      |                  |     |             |     | Average                  | ST Bootstrap |          |
| ST               | FREQ | SLV              | DLV | TLV         | SAT | Distance                 | Group        | Subgroup |
| 371              | 4    | 1                | 0   | 0           | 0   | 1.0                      | ***          | ***      |
| 31               | 1    | 1                | 0   | 0           | 0   | 1.0                      | ***          | ***      |

| CC32 (group 35) |      | No. Isolates = 3 |     | No. STs = 2 |     | Predicted Founder = None |              |          |
|-----------------|------|------------------|-----|-------------|-----|--------------------------|--------------|----------|
|                 |      |                  |     |             |     | Average                  | ST Bootstrap |          |
| ST              | FREQ | SLV              | DLV | TLV         | SAT | Distance                 | Group        | Subgroup |
| 32              | 2    | 1                | 0   | 0           | 0   | 1.0                      | ***          | ***      |
| 7               | 1    | 1                | 0   | 0           | 0   | 1.0                      | ***          | ***      |

### Singletons: size 181

2; 5; 6; 13; 14; 15; 17; 19; 20; 21; 22; 24; 27; 29; 30; 35; 36; 37; 39; 40; 41; 43; 44; 46; 48; 50; 51; 52; 53; 57; 58; 59; 60; 63; 64; 65; 66; 68; 71; 74; 76; 77; 78; 79; 80; 81; 82; 83; 87; 88; 89; 90; 93; 95; 100; 102; 104; 105; 106; 107; 110; 112; 113; 114; 116; 117; 119; 120; 123; 124; 125; 126; 128; 129; 130; 131; 132; 133; 136; 137; 139; 141; 143; 145; 146; 147; 149; 150; 151; 152; 154; 156; 157; 159; 160; 161; 167; 168; 169; 170; 171; 172; 173; 174; 177; 178; 180; 185; 188; 193; 194; 198; 201; 205; 206; 207; 209; 210; 211; 212; 213; 214; 215; 216; 217; 219; 221; 224; 226; 227; 228; 230; 231; 232; 233; 234; 235; 236; 237; 238; 239; 240; 242; 243; 244; 245; 246; 247; 248; 250; 251; 252; 253; 254; 255; 258; 259; 262; 263; 266; 267; 270; 271; 273; 275; 276; 278; 279; 281; 282; 283; 284; 285; 369; 370; 372; 375; 376; 377; 379; 387.
